# Supplementary material for: Synthesis of graphdiyne on a copper substrateviaa self-coupling reaction
Source: Royal Society of Chemistry journal article supplement (doi:10.1039/d2cp04384j), 2022-12-01
Supplement: d2cp04384j1.pdf [file d2cp04384j1.pdf]

**Supporting Information for**

**Synthesis of Graphdiyne on the Copper Substrate**

**via Self-coupling Reaction**

Jiasheng Wu,<sup>‡</sup> Jie Liu,<sup>‡</sup> Jizhe Liang, Yijie Zhang, Xiaoli Zhao, Chunxue Yuan\*

College of Materials Science and Engineering, Tongji University, Shanghai, 201804,  
China.

<sup>‡</sup> These authors contributed equally.

\* E-mail: [cxyuan@tongji.edu.cn](mailto:cxyuan@tongji.edu.cn)

## Experimental Section:

### Materials and Methods

All the compounds and reagents involved were purchased from Adamas-beta, Aldrich and TCI, and directly put into use without additional purification after receipt, except for toluene and acetone, which were dried by 3 Å molecular sieves. The morphology of GDY was observed by SEM (ZEISS Sigma 300/VP, acceleration voltage of 3 kV). FT-IR spectrum (BRUKER EQUINOX55) and Raman spectroscopy (HORIBA HR800, 532 nm) were employed to study the structure details. With the help of AlK $\alpha$  radiation, the X-Ray photoelectron spectrometer (XPS) was completely assembled on Thermo Scientific ESCALAB 250Xi photoelectron spectrometer. All electrochemical measurements were carried out with Bio-Logic potentiostat (VMP3) at r.t.. For HER and OER, 1 M KOH aqueous solution was utilized as electrolyte saturated with platinum mesh (15 mm  $\times$  15 mm) and graphite rod (diameter: 6 mm) as counter electrodes and an Hg/HgO electrode as the reference electrode in a three-electrode setup.  $^{13}\text{C}$  NMR spectra were collected on a Bruker AVANCE 400 spectrometer and the chemical shifts of synthesized molecules are reported in  $\delta$  ppm regarding the residual  $\text{CDCl}_3$ .

### Synthesis of monomer

Hexakis[(trimethylsilyl)ethynyl]benzene and Hexaethynylbenzene are synthesized as reported previously.

**Hexakis(bromoethynyl)benzene (hBEP)** : A flask was added NBS (85.3 mg, 0.475 mmol),  $\text{AgNO}_3$  (1.7 mg, 0.009 mmol) and Hexaethynylbenzene (14.669 mg, 0.066 mmol) in acetone (5 mL) respectively, and stirred persistently in dark conditions for 2 h. TLC was used to monitor the consumption of the reactant. Then, 50 mL petroleum ether was added to dilute the mixture, and the colorless crystals precipitated were filtered out to collect the filtrate. After being concentrated under reduced pressure, the filtrate was purified by column chromatography (eluent: n-hexane : dichloromethane = 17:3) to afford **hBEP** (0.18 g, 85% yield) as light yellow powders.  $^{13}\text{C}$  NMR (101 MHz,

DMSO)  $\delta$  127.79, 75.65, 64.92.

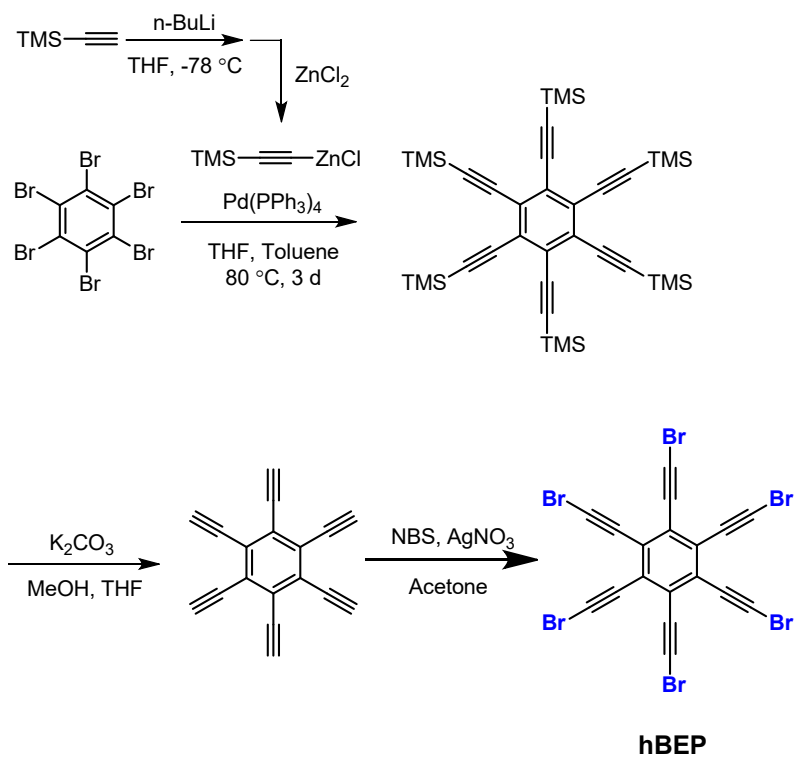

**Scheme S1.** Synthesis of **hBEP**.

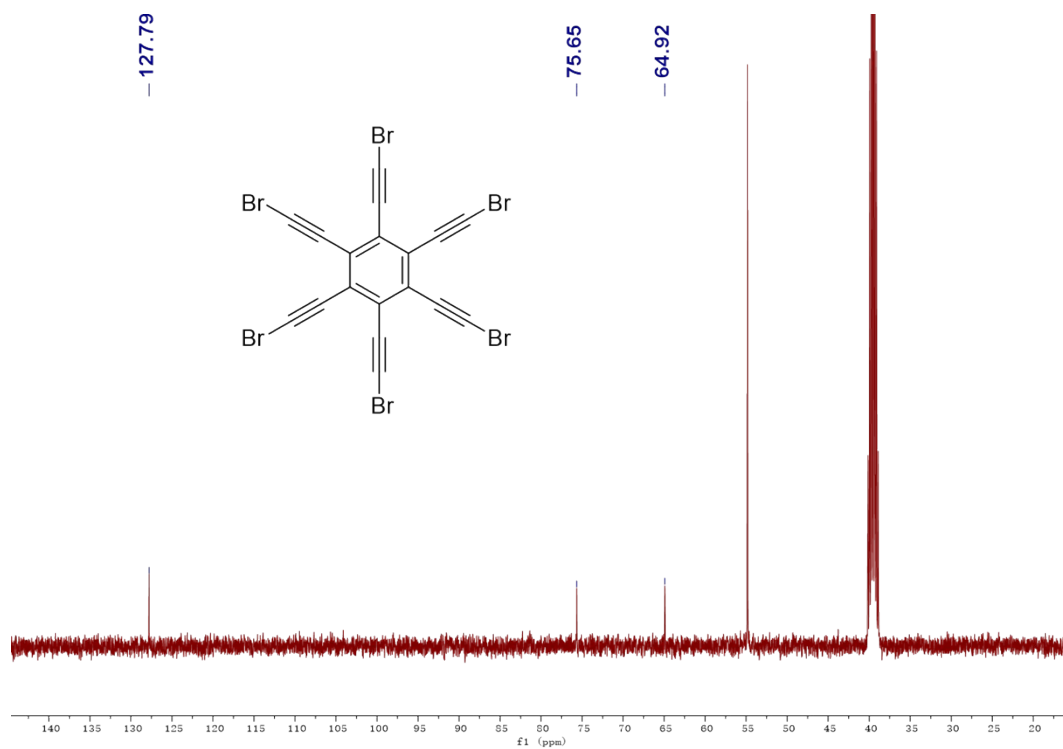

## Characterization

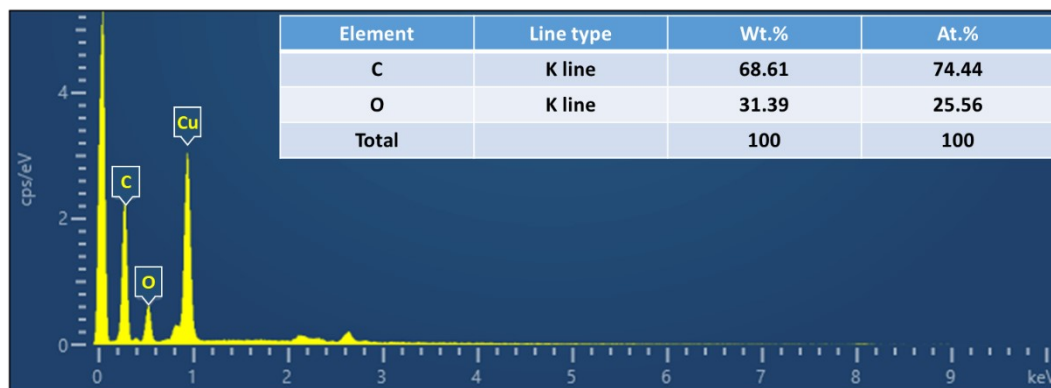

Fig. S2 EDS analysis of GDY.

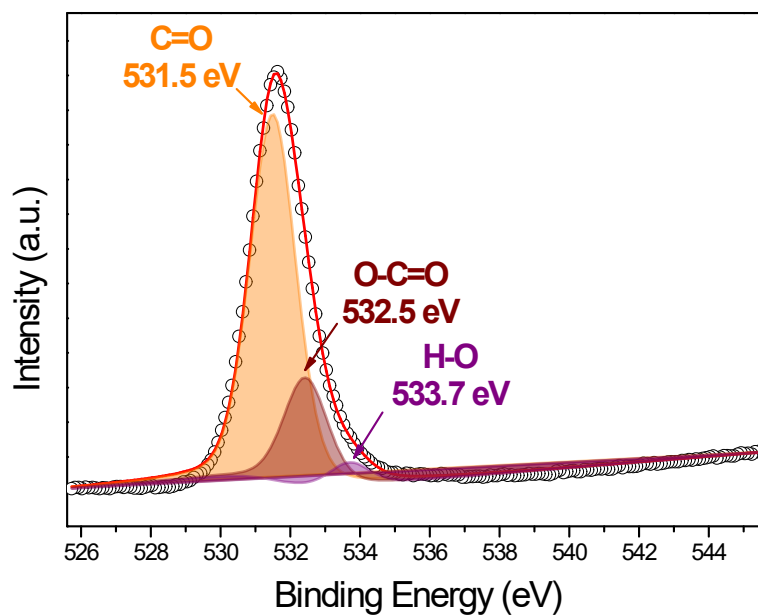

Fig. S3 XPS spectrum of O 1s of GDY.
